# Supplementary material for: Calcium-Free and Cytochalasin B Treatment Inhibits Blastomere Fusion in 2-Cell Stage Embryos for the Generation of Floxed Mice via Sequential Electroporation
Source: MDPI journal article supplement (doi:10.3390/cells9051088), 2020-04-28
Supplement: s1 [file s1]

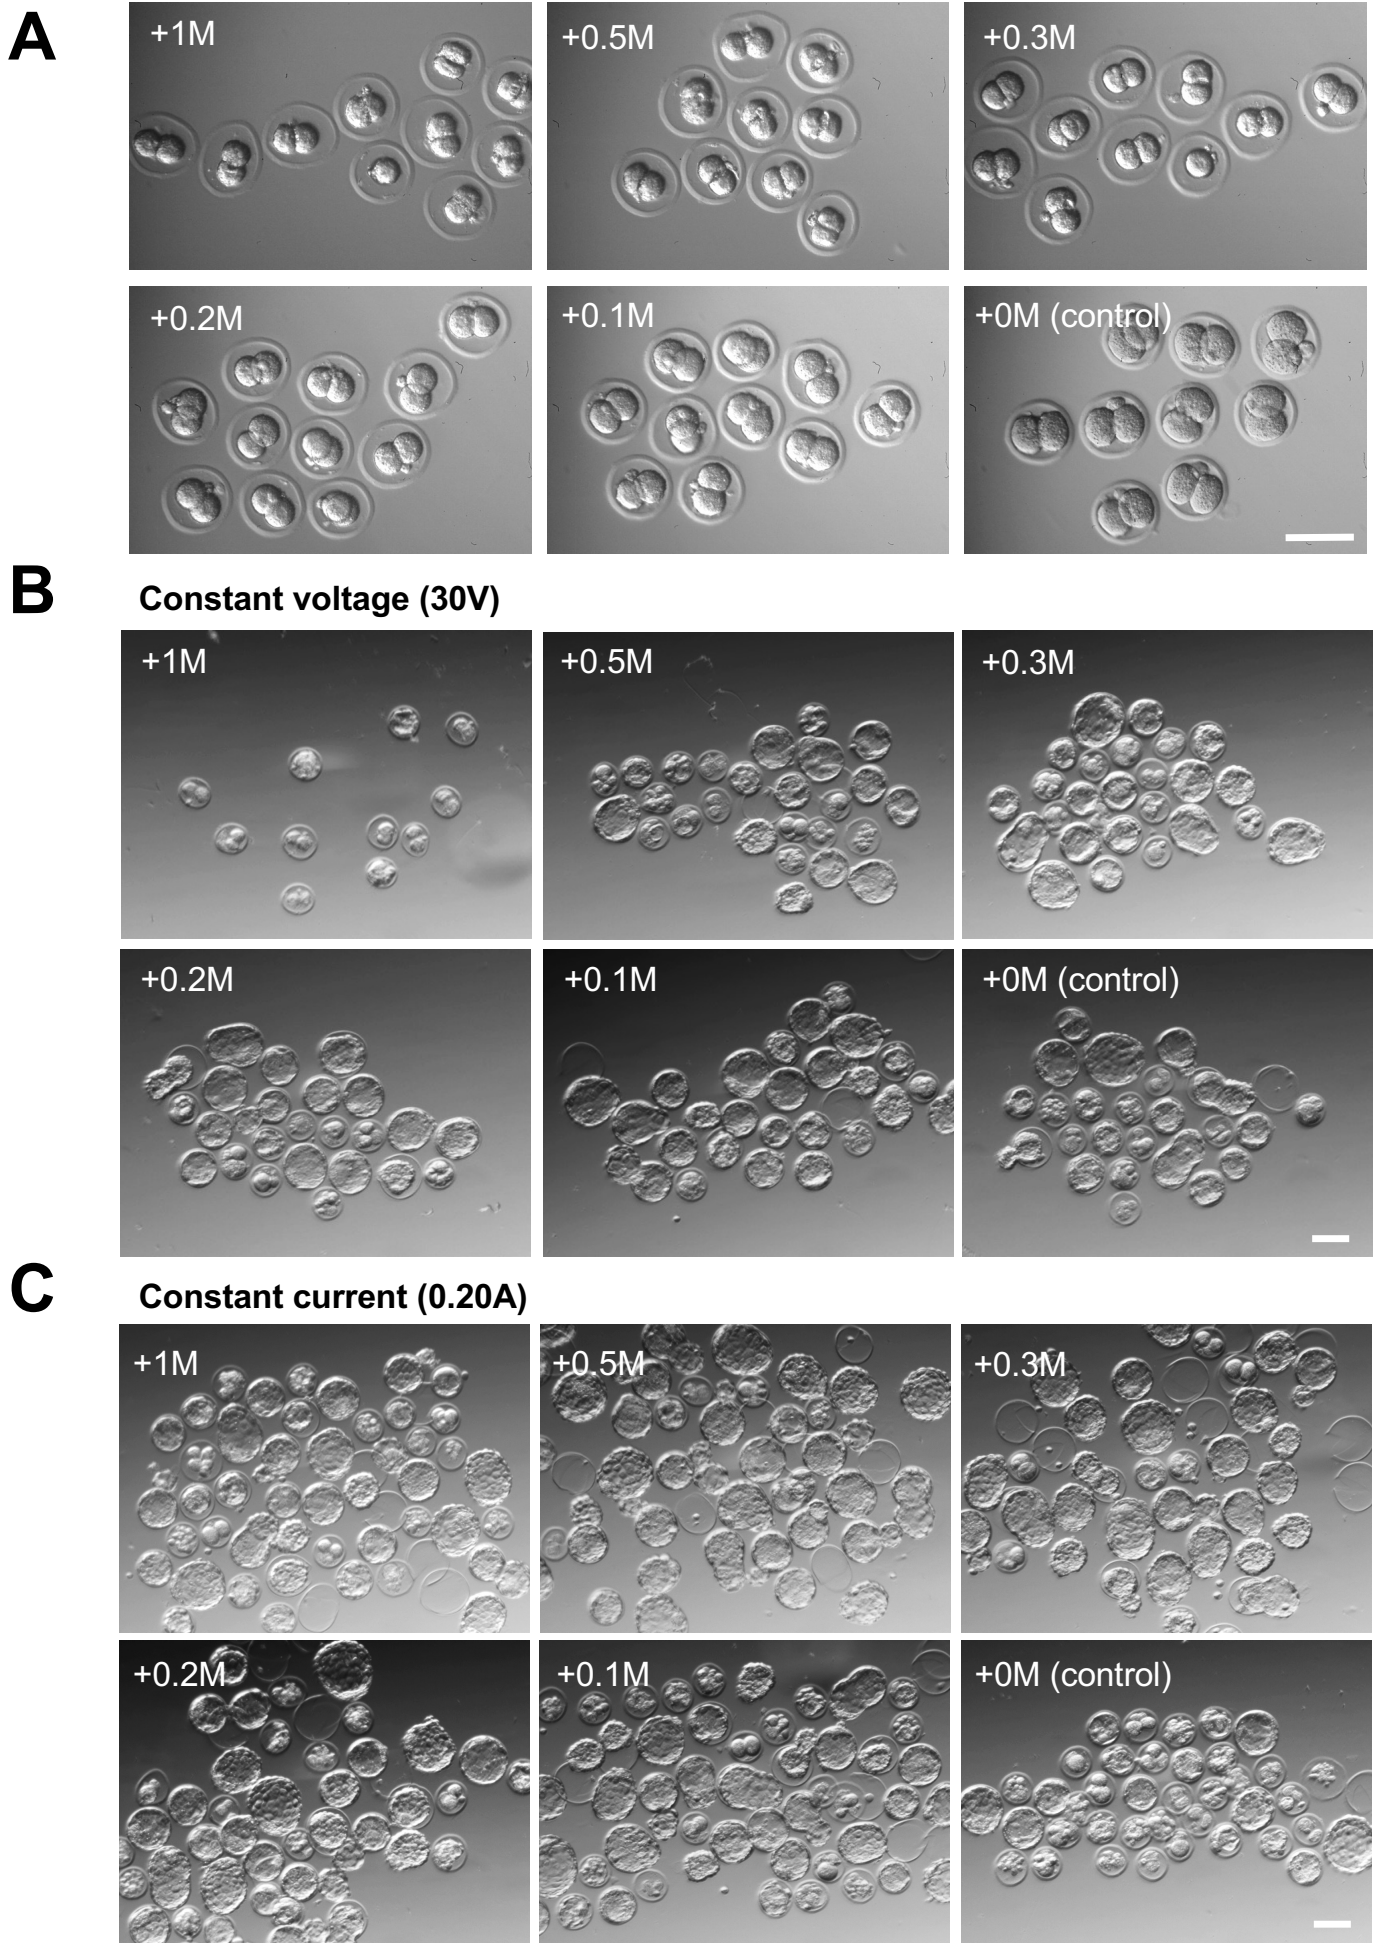

**Figure S1.** The morphology of embryos by hypertonic treatment. (A) 2-cell stage embryos after treatment with several hypertonic conditions. (B) *In vitro* development of embryos after 2-cell EP under constant voltage (30V). (C) Those under constant current (0.20A). Scale bars, 100  $\mu\text{m}$ .

**A**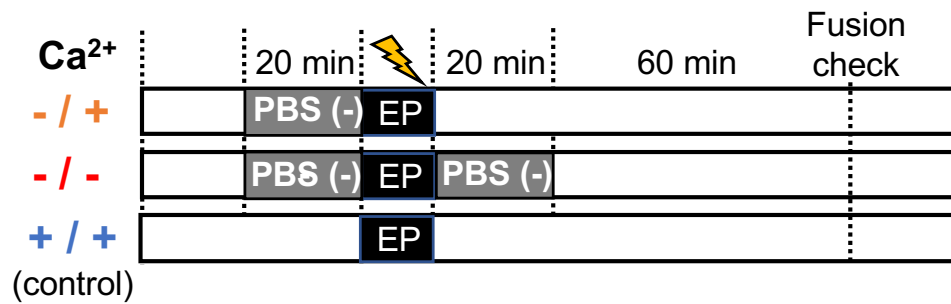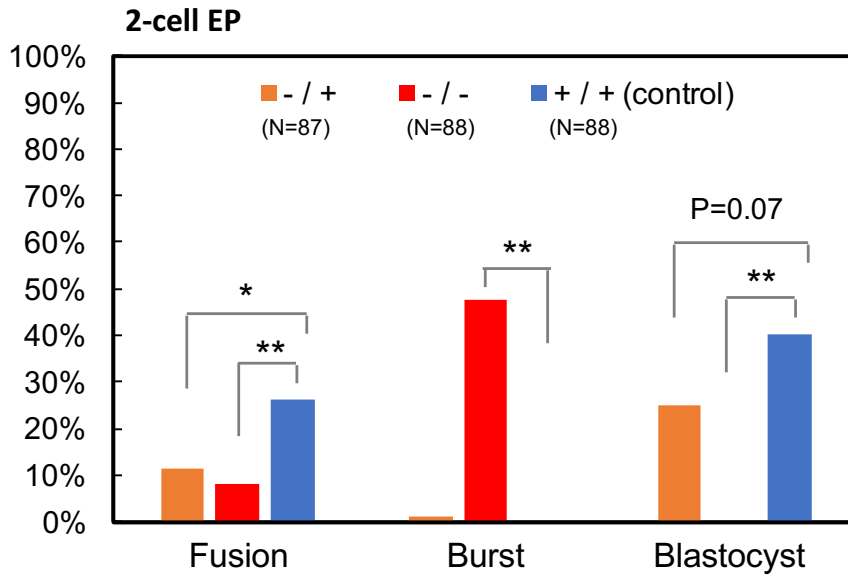**B**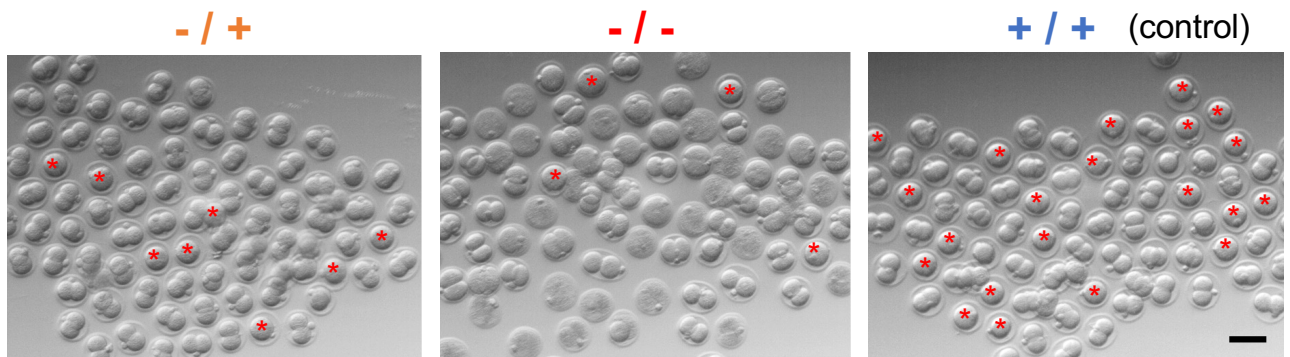**C**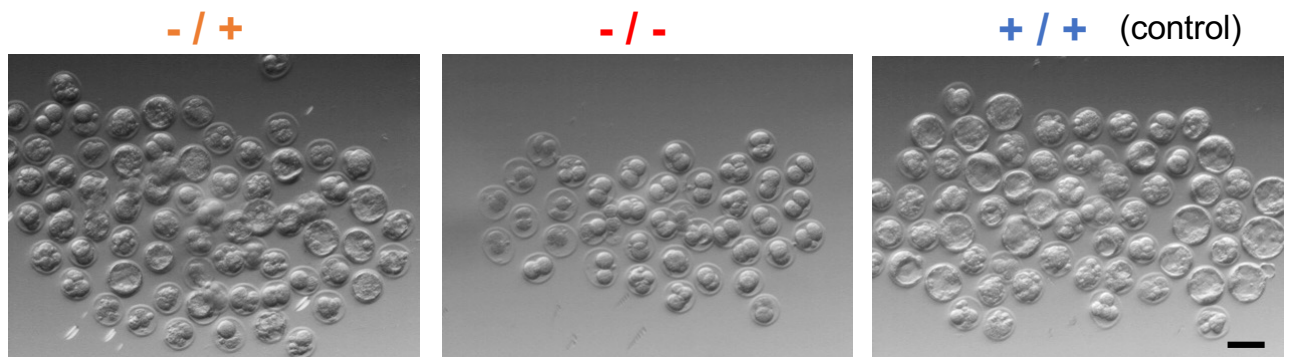

**Figure S2.** Effects of PBS(-) treatment on blastomere fusion and embryonic development of 2-cell EP. (A) Fusion, burst, and development (blastocyst) rate by 2-cell EP. (B) Morphology of 2-cell EP embryos. Asterisks indicate fused embryos. (C) Morphology of 2-cell embryos in 3 days of culture post-EP. N indicates the number of 2-cell stage embryos used for the analysis. \*P < 0.05, \*\*P < 0.01 (compared with control). Scale bars, 100  $\mu$ m.

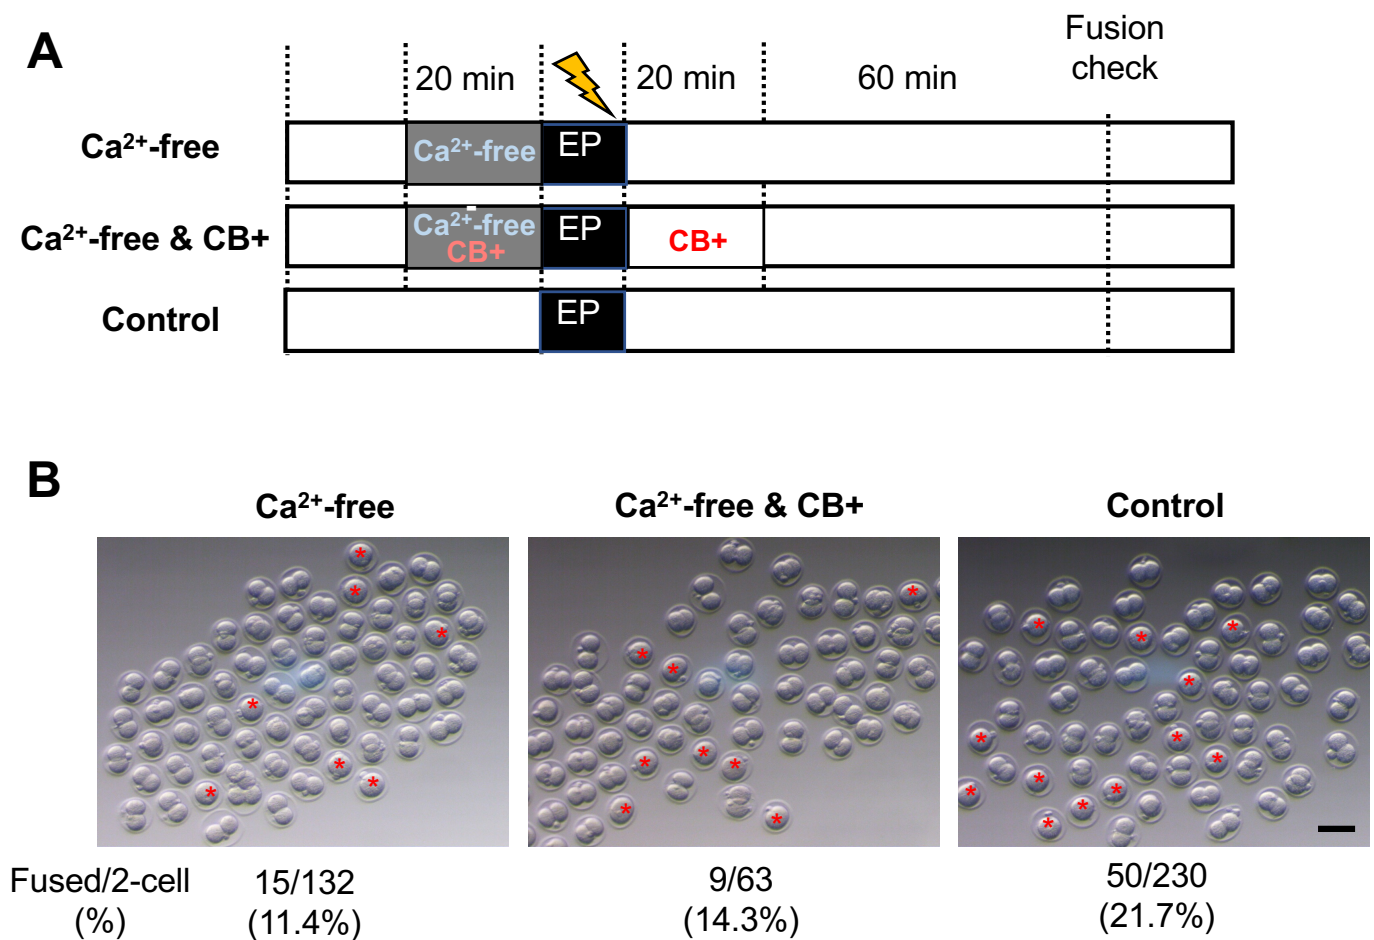

**Figure S3** The combined Ca<sup>2+</sup>-free and CB treatment does not have a better effect on blastomere fusion than the only Ca<sup>2+</sup>-free treatment. **(A)** Experimental timeline of Ca<sup>2+</sup>-free and CB treatment. **(B)** Morphology of 2-cell EP embryos. Asterisks indicate fused embryos. Scale bars, 100  $\mu$ m.
